# Supplementary material for: Enhancement of formic acid formation by nitrogen-doped graphene oxide nanosheets decorated with Sn nanoparticles in electrochemical CO2 reduction
Source: Royal Society of Chemistry journal article supplement (doi:10.1039/d3se00781b), 2023-01-01
Supplement: d3se00781b1.pdf [file d3se00781b1.pdf]

## Enhancement of formic acid formation by nitrogen-doped graphene oxide nanosheets decorated with Sn nanoparticles in electrochemical CO<sub>2</sub> reduction

Yuma Tano,<sup>a</sup> Muhammad Sohail Ahmad<sup>b,e\*</sup> Yuya Watase,<sup>a</sup> Tatsuki Tsugawa<sup>a</sup>, Satoko Takase,<sup>c</sup> Yusuke Inomata,<sup>a</sup> Kazuto Hatakeyama<sup>b</sup>, Shintaro Ida<sup>b</sup>, Quitain Armando<sup>d</sup>, Youichi Shimizu<sup>c</sup>, and Tetsuya Kida<sup>a,b,e\*</sup>

<sup>a</sup>Faculty of Advanced Science and Technology, Kumamoto University, 2-39-1 Kurokami, Chuo-ku, Kumamoto, 860–8555 Japan

<sup>b</sup>Institute of Industrial Nanomaterials (IINa), Kumamoto University, 2-39-1 Kurokami, Chuo-ku, Kumamoto, 860–8555 Japan

<sup>c</sup>Department of Applied Chemistry, Graduate School of Engineering, Kyushu Institute of Technology, 1-1 Sensui-cho, Tobata, Kitakyushu 804-8550, Japan

<sup>d</sup>Center for International Education, Kumamoto University, Kumamoto 860-8555, Japan

<sup>e</sup>International Research Organization for Advanced Science and Technology (IROAST), Kumamoto University, Kumamoto 860-8555, Japan

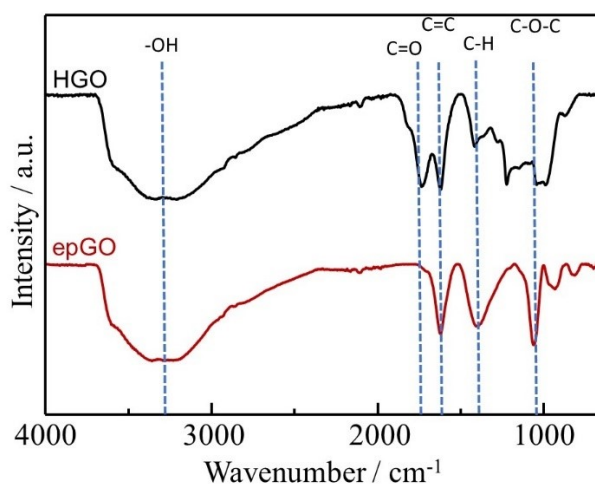

Figure S1: FT-IR spectra of HGO and epGO.

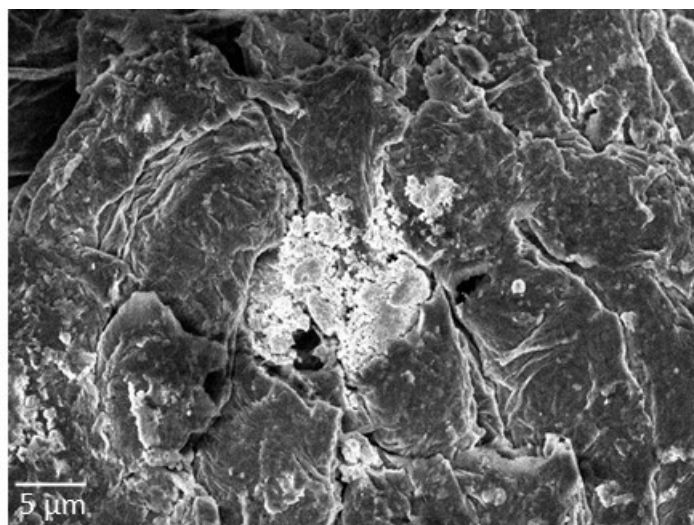

Figure S2: Aggregation of Sn on graphene after thermal annealing.

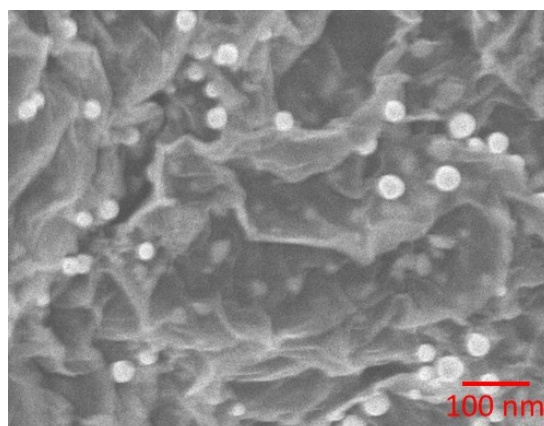

Figure S3: A representative TEM image of Sn on graphene oxide (Sn/rHGO). Hydrothermally prepared SnO<sub>2</sub> was used as the precursor.

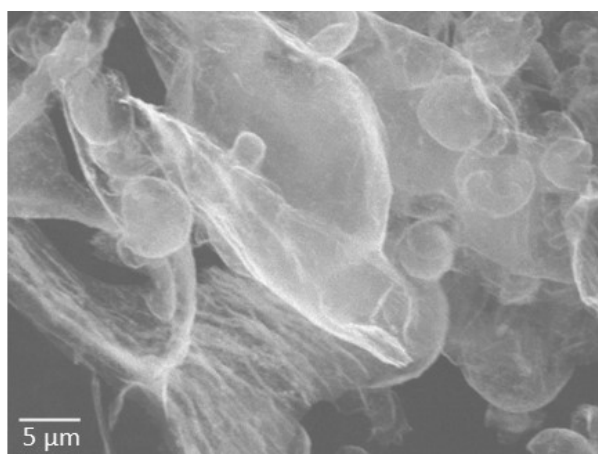

Figure S4: A representative TEM image of Sn on graphene oxide (Sn/rHGO). Commercial SnO<sub>2</sub> was used as the precursor.

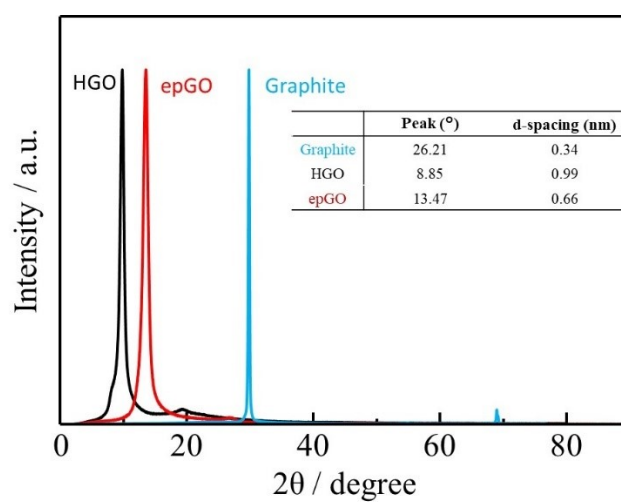

Figure S5: XRD patterns of GO synthesized by the Hummers' method (HGO), epoxy-controlled GO (epGO), and starting precursor, graphite.

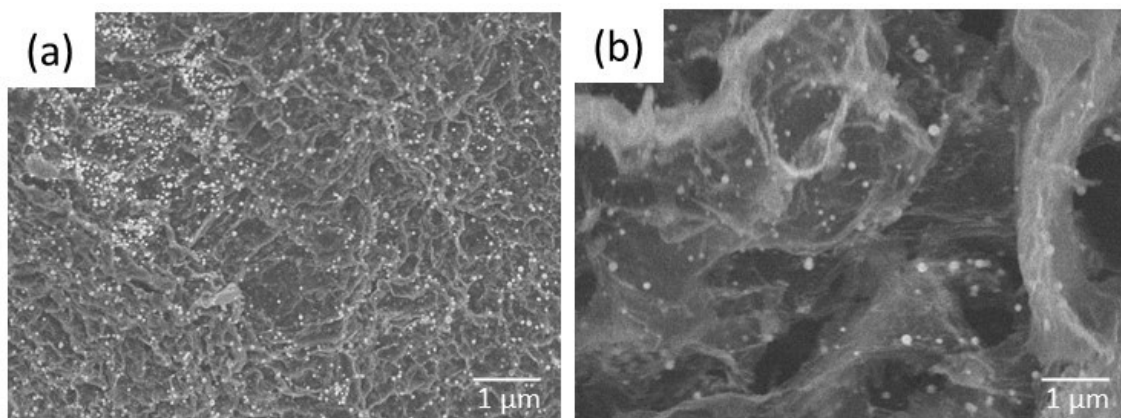

Figure S6: SEM images of (a) Sn/NrHGO and Sn/NrepGO.

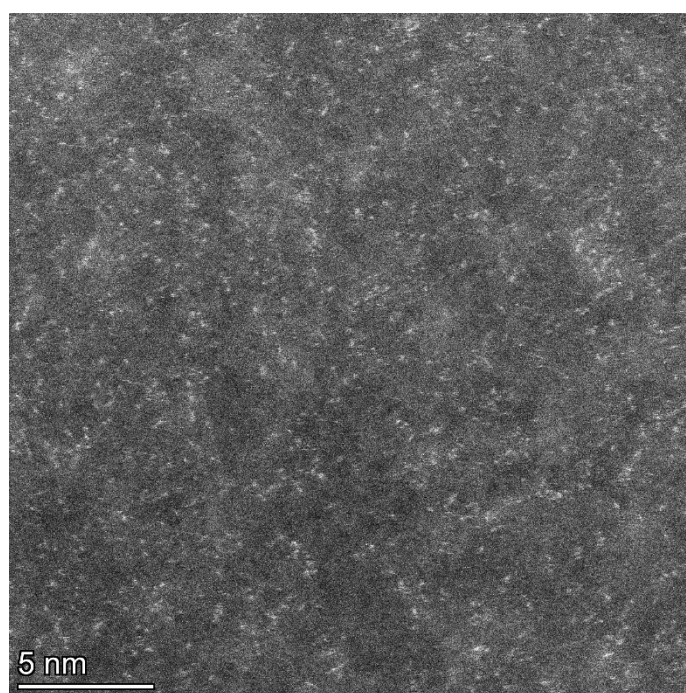

Figure S7: HRTEM image of Sn/NrepGO. The high-density bright dots correspond to atomic Sn, which are homogeneously distributed across the entire graphene framework.

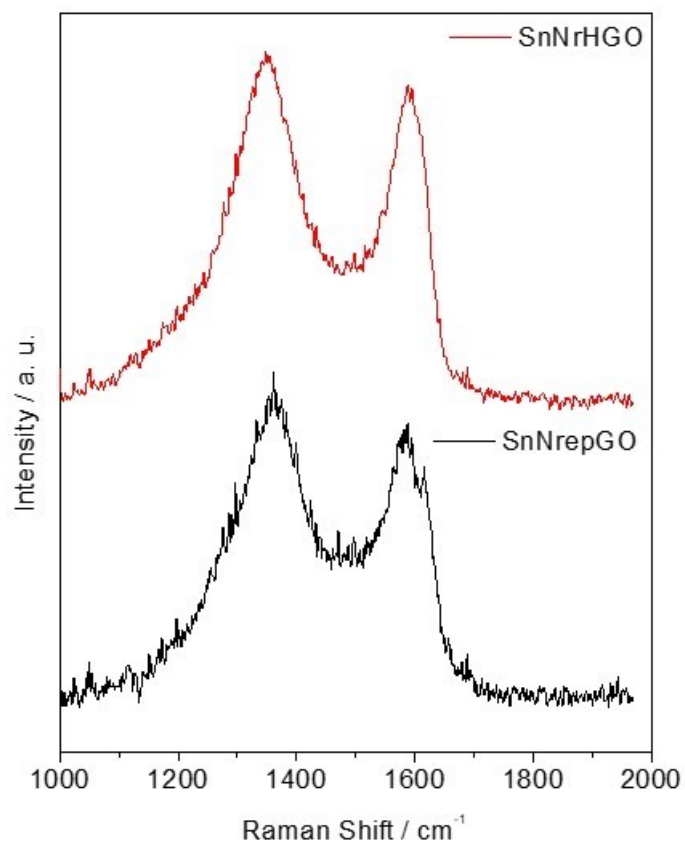

Figure S8: Raman spectra of Sn/NrHGO and Sn/NrepGO.

Table S1: Raman spectrum of graphene oxide and composites. The unit of the spectra is  $\text{cm}^{-1}$

| Entry |                | $I_D/I_G$ |
|-------|----------------|-----------|
| 1     | Graphene oxide | 1.00      |
| 2     | repGO          | 1.13      |
| 3     | rHGO           | 1.14      |
| 4     | Sn/NrepGO      | 1.10      |
| 5     | Sn/NrHGO       | 1.11      |

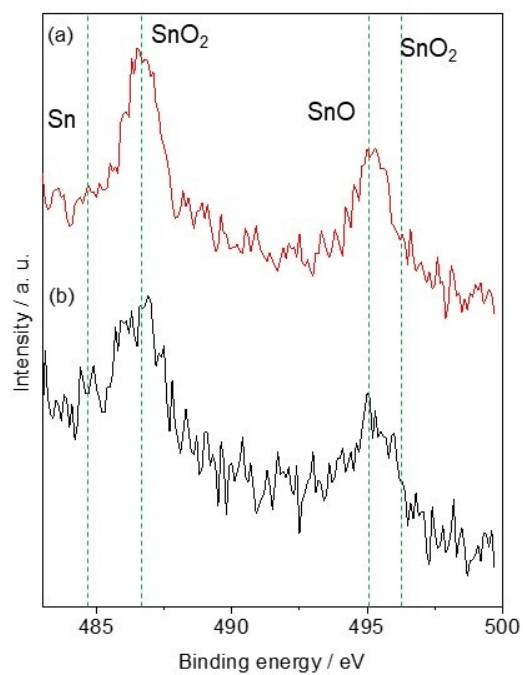

Figure S9: Sn 3d XPS deconvoluted spectra of (a) Sn/NrepGO and (b) Sn/NrHGO.

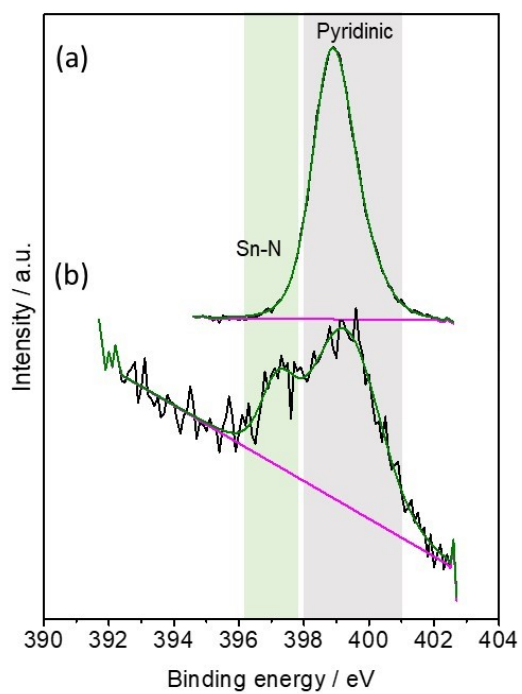

Figure S10: N 1s XPS deconvoluted spectra of (a) Sn/NrepGO and (b) Sn/NrHGO.

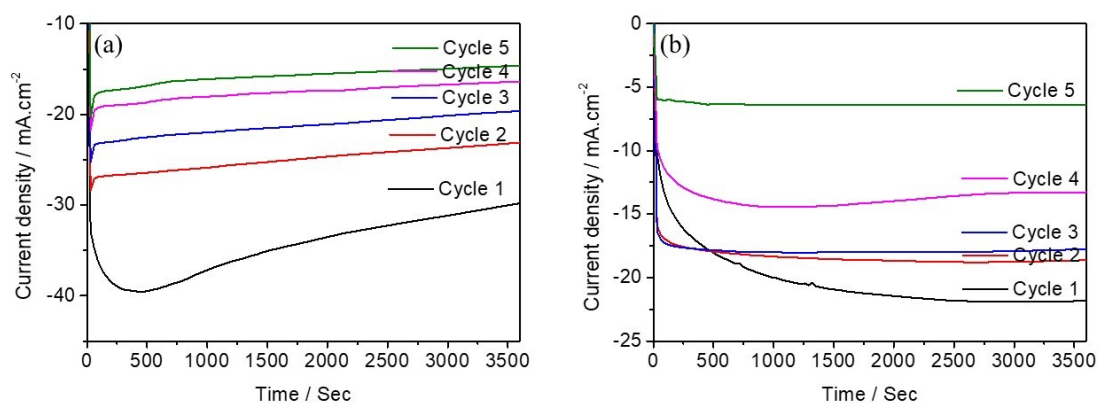

Figure S11. Cycle durability of the (a) Sn/NrepGO, (b) Sn/NrHGO electrodes at -1.6 V vs Ag/AgCl (1M KOH under CO<sub>2</sub> flow).

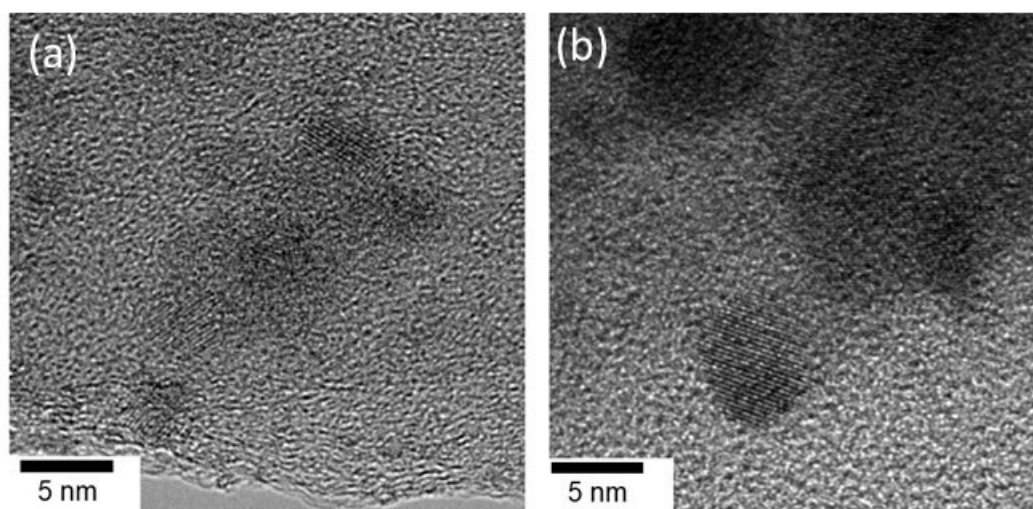

Figure S12. STEM images of the Sn/NrHGO electrode (a) before and (b) after the electrochemical test. The images obtained after a 1 h CA test showed that the Sn particles almost retained their original shape and sizes.

Table S2. Comparison of the performance of Sn/NrepGO with the reported catalysts.

| Catalyst                       | electrolyte              | Sn quantity (mg/cm <sup>2</sup> ) | Applied voltage (vs. RHE) | FE for formic acid | Ref.      |
|--------------------------------|--------------------------|-----------------------------------|---------------------------|--------------------|-----------|
| Sn/NrepGO                      | 1 M KOH                  | 0.34                              | -0.57                     | 75                 | This work |
| Sn NP/C-GDE                    | 0.5 M KHCO <sub>3</sub>  | 0.75                              | -1.5                      | 70                 | 1         |
| CuSn                           | 0.5 M KHCO <sub>3</sub>  | N/A                               | -1.3                      | 57                 | 2         |
| SnO <sub>2</sub> /carbon black | 0.1 M NaHCO <sub>3</sub> | 0.212                             | -1.8                      | 86                 | 3         |
| Sn/rGO_800                     | 0.1 M KHCO <sub>3</sub>  | 0.510                             | -0.82                     | 98                 | 4         |

- (1) A. Del Castillo, M. Alvarez-Guerra, J. Solla-Gullón, A. Sáez, V. Montiel and A. Irabien, *J. CO<sub>2</sub> Util.*, 2017, **18**, 222–228.
- (2) M. Watanabe, M. Shibata, A. Kato, M. Azuma and T. Sakata, *J. Electrochem. Soc.*, 1991, **138**, 3382.
- (3) S. Zhang, P. Kang and T. J. Meyer, *J. Am. Chem. Soc.*, 2014, **136**, 1734–1737.
- (4) T. Tsujiguchi, Y. Kawabe, S. Jeong, T. Ohto, S. Kukunuri, H. Kuramochi, Y. Takahashi, T. Nishiuchi, H. Masuda, M. Wakisaka, K. Hu, G. Elumalai, J. Fujita and Y. Ito, *ACS Catal.*, 2021, **11**, 3310–3318.
